**Co-design and refinement of an optimised antenatal education session to better inform women and prepare them for labour and birth.**

Abi Merriel. Centre for Women's Health Research, Department of Women's and Children's Health, Institute of Life Course and Medical Sciences, University of Liverpool, Academic Women's Health Unit, University of Bristol, North Bristol NHS Trust

Miriam Toolan. Academic Women's Health Unit, University of Bristol, 0000-0002-0779-3897

Mary Lynch. North Bristol NHS Trust

Gemma Clayton. Integrated Epidemiology Unit, Population Health Sciences, University of Bristol, 0000-0002-9525-2758

Andrew Demetri. Academic Women's Health Unit, University of Bristol, and North Bristol NHS Trust, 0000-0002-2820-5919

Lucy Willis. Academic Women's Health Unit, University of Bristol

Narendra Mampitiya. Academic Women's Health Unit, University of Bristol

Alice Clarke. North Bristol NHS Trust. [0000-0002-1176-1521](https://orcid.org/0000-0002-1176-1521)

Katherine Birchenall. Academic Women's Health Unit, University of Bristol  
0000-0002-7261-4832

Chloe de Souza. North Bristol NHS Trust

Emma Harvey. Academic Women's Health Unit, University of Bristol  
0009-0009-3680-9454

Tamarind Russell-Webster Academic Women's Health Unit, University of Bristol  
0000-0001-5820-6157

Eva Larkai. Academic Women's Health Unit, University of Bristol  
0000-0002-8316-7943

Mariusz Grzeda. Faculty of Life Sciences & Medicine, King's College London ; ORCID:  
0000-0002-4249-2520

Kate Rawling. Parent Representative

Sonia Barnfield, North Bristol NHS Trust

Maggie Smith, North Bristol NHS Trust

Rachel Plachcinski, National Childbirth Trust

Christy Burden, Academic Women's Health Unit, University of Bristol, North Bristol NHS Trust 0000-0001-6409-5238

Abigail Fraser, Population Health Sciences, Bristol Medical School, University of Bristol. ORCID: 0000-0002-7741-9470

Michael Larkin, Institute of Health and Neurodevelopment, Aston University, 0000-0003-3304-7000

Anna Davies, Academic Women's Health Unit, University of Bristol

### **Abstract:**

**Objective:** To co-design, implement, evaluate acceptability and refine an optimised antenatal education session to improve birth preparedness.

**Design:** There were four distinct phases: co-design (focus groups and co-design workshops with parents and staff); implementation of intervention; evaluation (interviews, questionnaires, structured feedback forms), and systematic refinement.

**Setting:** A single maternity unit with approximately 5,500 births annually.

**Participants:** Postnatal and antenatal women/birthing people, birth partners and clinicians.

**Outcome measures:** To establish whether the optimised session is deliverable, acceptable, meets the needs of women/birthing people and partners, and refine it with input from parents, clinicians and researchers.

**Results:** The co-design was undertaken by 35 women, partners and clinicians. Five midwives were trained and delivered 19 Antenatal education (ACE) sessions to 142 women and 94 partners. 121 women and 33 birth partners completed the feedback questionnaire.

Women/birthing people(79%) and birth partners(82%) felt more prepared after the class with most participants finding the content very helpful or helpful. Women/birthing people perceived classes were more useful and engaging than their partners. Interviews with 21 parents, a midwife focus group and a structured feedback form resulted in 38 recommended changes: 22 by parents, 5 by midwives and 11 by both. Suggested changes have been incorporated in the training resources to achieve an optimised intervention.

### **Conclusions**

Engaging stakeholders (women and staff) in co-designing an evidence informed curriculum resulted in an antenatal class designed to improve preparedness for birth, including assisted birth, that is acceptable to women and their birthing partners, and has been refined to

address feedback and is deliverable within NHS resource constraints. A nationally-mandated antenatal education curriculum is needed to ensure parents receive high-quality antenatal education that targets birth preparedness.

### **Key messages**

***What is already known:*** Antenatal education is used to prepare women/birthing parents for labour, birth and the postnatal period, but it has been eroded. Antenatal education has potential to support women/birthing parents in developing their expectations around labour and the postnatal period, via improved health literacy. Improving antenatal education could be impactful as the expectation-experience gap is linked to post traumatic stress disorder.

***What this study adds:*** We have shown that a co-designed, optimised antenatal class can provide information helpful to parents and important to staff, within the constraints of the NHS resources

***How this study might affect research, practice or policy:*** This study can be used to understand what parents need from antenatal education, and how to begin to address the expectation-experience gap.

## **Introduction:**

Antenatal education (ANE) has been used to prepare women/pregnant people for labour, birth for many years.<sup>1</sup> It is a vital element of antenatal care and is incorporated into the NICE guidelines.<sup>2</sup> ANE contributes to practical preparation, but it can contribute to a woman/pregnant person's expectations and experience of labour and birth and consequently their psychosocial outcomes.<sup>3</sup>

When considering what is important to them about birth, women prioritise the physiological birth of a healthy baby. However, when things do not go according to their plan, they wish to retain a sense of personal achievement and control through active decision-making.<sup>4</sup> Empowering women/pregnant people to participate in this process through high-quality antenatal education has been shown to mediate childbirth satisfaction.<sup>5</sup>

Antenatal preparation has the potential to support women/pregnant people in developing their expectations. This is important because an expectation-experience gap increases risk of post-traumatic stress disorder (PTSD).<sup>5</sup> The origins of a woman/pregnant person's PTSD are not likely to lie solely with birth,<sup>6</sup> but high rates of stress-related symptoms are experienced following unanticipated intervention in labour. Up to half have PTSD two months after unplanned Caesarean compared to 24% at six weeks after vaginal birth.<sup>7</sup> Risk factors for PTSD include subjective birth experience relating to negative emotions and lack of control or agency, operative birth and lack of support from staff during birth.<sup>6</sup> Up to 1.5% of women experience PTSD six months postnatally.<sup>8</sup> There may also be a link between birth expectations and depression.<sup>5</sup> Good quality ANE provides an understanding of common interventions that might become necessary, and could attenuate the expectation-experience gap.

ANE provision is variable, less than a third of women are offered antenatal classes.<sup>9</sup> ANE is available within the NHS, privately-for-profit or not-for-profit, by clinicians and allied healthcare staff, or by trained antenatal educators. ANE can be traditional information provision classes or focussed on self-directed coping strategies e.g. hypnobirthing; some pregnancy exercise classes also provide elements of education and preparation. Different classes may have a particular focus (for example physiological birth) or a clear goal to

provide evidence-based information. This area is un-regulated and although NICE recommend ANE for all women in their first pregnancy, they do not provide comprehensive guidelines on what should be covered in classes.<sup>2</sup>

Prior to this intervention development study, we conducted focus groups with 48 postnatal women.<sup>10 11</sup> They described limited discussion of common interventions (e.g. assisted birth, induction) and birth experiences (e.g. perineal trauma) resulting in them believing that these events were infrequent and unnecessary to learn about. Participants reflected that receiving sensitively provided information about the frequency and nature of interventions and common events during birth was important and could support psychological health if birth experiences were not as expected. When discussing ANE with midwives (unpublished) we found many were not provided with specific training to deliver ANE, nor did they enjoy or want to deliver it. Furthermore, midwives often designed the class materials themselves, with little assistance or guidance.

We aimed to improve antenatal education provision by co-designing and refining an optimised antenatal education package (ACE).

## **Methods:**

### *Ethical approvals*

This study was approved by Wales Research Ethics Committee 6 (reference: 21/WA/0091).

The methods are presented in the four phases: Co-design (2019), trial implementation (2021-2022), evaluation and refinement (2021-2022).

### *Research team and organisational commitment:*

The initial research team was made up of obstetricians (AM, MT, SB, CB), midwives (MLy, MS), psychologists (ADa, EA, MLa), service users (KR), NCT representative (RP), epidemiologist (AF), project manager and medical students (TRW,EL). As the project progressed and was impacted by COVID-19 additional trainee obstetricians (ADe, CdS, KB), doctor-in-training (AC) and medical students (LW, NM, EH) joined the research team.

ACE was supported by the Head of Community Midwifery (MS) and the then Head of Obstetrics (SB). This facilitated delivery of the study and will enable future roll out.

*Patient and public involvement:*

Parents were involved from the inception of the study and played an active role in the design. A parent sat on the study steering group (KR) and parents co-designed the ACE intervention, drawing on the data generated in focus groups/survey studies.

*Study setting and context:*

This study was delivered in a single hospital in the South-West of England with 5500 births annually. It was conducted before and during the COVID-19 pandemic (2019 to 2022) when there was limited provision of ANE and limited contact between staff and women.<sup>12</sup>

*Frameworks to inform intervention development:*

We used the Medical Research Council's Complex Intervention Development Framework (2008) to develop the ACE intervention.<sup>13</sup> The consolidated framework for advancing implementation science (CFIR) was used to plan and support initial testing and further development of the intervention,<sup>14</sup> to ensure preparedness for implementation.

***Phase 1: Co-design***

Co-design was chosen as a method to involve service users in the development of the ACE session because patient experience, outcomes and safety are linked.<sup>15</sup> We saw the best way to improve patient experience as being to involving service users in the intervention design. We used and adapted experience-based co-design (EBCD) approach.<sup>16 17</sup> Figure 1 shows the EBCD steps and our adaptations to them. We included the two core co-design elements: service user experience data and including service users in the design.<sup>17</sup> The planned output from the co-design was a two-hour ACE session on labour and birth, and materials to deliver the session.

***Phase 2: Implementation***

*Recruitment of antenatal educators:*

We recruited community midwives who deliver antenatal education. Those agreeing to take part were invited to a training session. All time contributed to training and delivery of ACE was remunerated via the midwifery 'bank' system.

*Antenatal education group attendees:*

We invited women/birthing people who were over 18 years of age, more than 24 weeks pregnant and in the care of the local trust to participate. We informed them that the ACE session was a supplement to their NHS offered session. They were asked to invite their partners if they wished. Recruitment was via 1) social media, 2) community midwifery referrals, 3) telephone calls to all eligible pregnant women/birthing people. Women/birthing people and their partners were given written information via email. They then booked into a session on the date of their choice, completed an online consent form and provided basic demographic information.

*Impact of the COVID-19 pandemic:*

We paused this study as face-to-face ANE was halted soon after the co-design groups had finished. We re-started this study when face-to-face interactions were permitted, and ran ACE classes in a COVID-secure way. Parents were therefore invited to a central location in the evenings, rather than the originally planned local venues.

*Training in delivering the ACE session:*

A training session was held for midwives. As provision expanded, midwives new to the programme attended an ACE session delivered by an experienced facilitator and discussed it with her.

*Cost of implementation*

Reusable resources included a projector, printed posters and attachable reusable stickers, costing £150-200. Each woman/birthing person requires a printout of the 'what is important to me' tool. Existing resources (e.g. pelvis and doll, kiwi cups) were drawn upon. After midwifery training, the remainder of the costs were identical to existing costs to deliver antenatal education.

### ***Delivery:***

The session was 2 hours long and (due to COVID-19) restricted to 10 participants and their partners. The research team observed each session, noting attendance and contemporaneously recording the extent to which the intervention was delivered as intended (fidelity), and the session length. Women received a £10 voucher for their expenses.

### ***Phase 3: Evaluation***

The ACE class was evaluated/refined in 5 ways:

- 1) Immediate debrief with midwife delivering the session

This discussion between the midwife and research team was recorded on a structured form to identify successes and areas for improvement. Feedback was reviewed after each session by the study lead(AM)/trial manager(ADa) to identify any immediate changes to implement.

- 2) Online questionnaire for women/birthing people and birth partners.

An online survey hosted in REDCap<sup>18</sup> was sent out within 2 weeks of attending the session. Participants were asked to rate the content, delivery and resources and how useful the session was in preparing them for childbirth. They were asked if they had attended other ANE, and if so to compare the ACE sessions to these. Quantitative data were analysed in STATA, and themes from free-text feedback were coded by a researcher. This was analysed at the end of the study to provide overall feedback and identify additional refinements.

- 3) Semi-structured feedback interviews with women/birthing people +/- birth partner approximately 2 weeks after attending the ACE session and/or 4-6 weeks after birth.

At the end of the classes women/birthing people +/- their birth partners were asked to express interest in being interviewed about the class. Interviews were conducted either before their baby was born (approximately 2 weeks post ACE Class), or 4-6 weeks after their baby was born. Parents could take part in one or both interviews.



These could be conducted alone or with their partner in attendance. We purposively sampled parents who had attended sessions delivered by different midwives, both at the start and end the implementation capture a range of experiences.

Interested parents were offered written information and a mutually convenient time for a telephone interview. Informed consent was obtained via a form hosted in REDCap.<sup>18</sup> The interviews were audio recorded and rapid thematic analysis performed directly from the audio recordings to identify areas for change and areas where feedback was positive. A £10 voucher was provided.

#### 4) Midwife focus group

We undertook a single one-hour focus group the midwives who delivered the ACE class to gather feedback about their experiences of the class, the manual, and any required improvements. The group was audio recorded and rapid thematic analysis carried out from the audio files. A £10 voucher was provided.

#### ***Phase 4: Refinement and reporting of findings.***

The findings from the immediate session feedback were iteratively implemented into the intervention. The findings from the online questionnaires and from the focus groups were analysed once at the end of the study and therefore refinements were only included in the updated ACE resources (supplementary file 2).

Potential changes to the manual and materials, were recorded in an adapted Table of Changes.<sup>19</sup> This shows the changes suggested, how frequently, whether it was feasible and reasonable to make the change and what change was actually made. This provided a systematic, rigorous approach to identifying potential changes, facilitating discussions between the study team, and agreeing final changes.

### **Results:**

#### ***Phase 1: Co-design***

Five co-design groups were undertaken with 29 women, 4 partners, 3 maternity staff. They developed the concept for the ACE class, the topics, planned the materials, and discussed the importance of training for the staff.

The group designed the ACE class around a river journey, conceptualising the process of birth as a journey down the river, with a winding course that represented the different stages of labour that may be experienced before reaching birth. The river served as a metaphor to illustrate that labour and birth could take a number of different courses, but all would end in a postnatal bay with their baby, where support from friends, family and healthcare professionals would be available.

The topics identified in response to the focus group data were: differing birth journeys (spontaneous vaginal, induction, assisted vaginal birth, planned caesarean, unplanned caesarean); coping with labour and birth (pharmacological and non-pharmacological); the immediate postnatal period; birth preferences; and social support. The co-design group believed a variety of different birth experiences should be reflected within the ACE session. We therefore made videos of their experiences of vaginal births, assisted vaginal births, quick and long inductions of labour and planned and emergency caesarean births.

The co-design group planned a 'what is important to me' preferences tool, to support attendees in considering their birth preferences. The tool focuses on the birth of a healthy baby at the end of labour and how their preferences could aim to achieve this (supplementary file 2).

### ***Phase 2: Implementation***

A 3-hour training session for midwives was designed and delivered online and in person as desired. The ACE manual provided a session outline. Five midwives ran 19 ACE sessions, delivered to 142 women and 94 partners. On two occasions midwives were unable to attend within 6-12 hours of the session, the project lead (AM – obstetrician) delivered the sessions to avoid inconvenience. The demographics of those attending the session are presented in table 1.

### ***Phase 3: Evaluation***

#### *Fidelity of delivery:*

During the 19 sessions, most of the class content was covered consistently; in all or a majority of sessions the following content was addressed or partially addressed: birth journeys (n= 19/19), coping strategies (n= 19/19), social support (n=14/19), partner support (n=18/19). A social opportunity was provided inconsistently (n=8/19). Across groups, materials and resources were well utilised with the exception of the 'what is important to me' birth preferences tool which was not used in over half of the classes (n=8), although it was explained in the majority (n=17/19). Supplementary file 3 provides detailed observations and feedback.

#### *Feedback from participants*

##### *Interviews*

21 Interviews were conducted: 13 antenatally, 7 postnatally. One couple completed both antenatal and postnatal interviews. For 3 interviews, women were interviewed with their partners. Participants valued attending a class with an NHS professional, feeling that it was an opportunity to get good-quality information about their local setting and the care they could expect. Most reported that the river concept was useful and that while a great deal of information was being given, it met their needs and was not overwhelming. Several women felt that more information around the impact of decisions, for example induction of labour, would be beneficial. They desired more opportunity for social interaction between class participants. Supplementary file 4 contains a summary of themes and supporting quotes.

##### *Questionnaires*

121 women(W) and 33 birth partners(BPs) completed the online feedback form following the class (demographics in table 1). Most participants attended in their third trimester, were aged 30-35, were of white ethnicity(89% W, 85% BPs) and were university educated (70% W, 64% BPs).

When considering how prepared the participants felt after the class, 79% of women and 82% of birth partners felt more prepared than they were beforehand. The majority reported having improved knowledge of strategies to cope with pain (W 79%, BP 82%) and to use if

things didn't go according to plan (W 81%, BP 85%). Further feedback is provided in figure 2. Women found the sessions more useful and engaging than their birth partners. However, when considering the specific areas of information provided (figure 3) most women and their partners found much of the session content to be very helpful or helpful.

121 women responded to questions about the attendance of the birth partner, of these 90 (74%) women reported that their birth partners attended the class. Of those whose partner did not attend, 21 reported that they could not make the session. Seventy-six percent of felt that it was very important that they could bring their partner, and 95% of those whose partner attended thought that the class was useful to their birth partner. Most women (93%) stated that they would recommend to a friend that they bring a birth partner with them.

When comparing ACE with other classes, 58% of women and 52% of birth partners planned to attend other classes, with the most popular being hypnobirthing (37% women, 24% birth partners). When comparing ACE and NHS classes only 11 women and 5 partners had attended NHS classes prior to their ACE session, preventing meaningful conclusions from being drawn. However, participants indicated that they received similar information and that both were useful. However, if they had to pick one class the majority of participants stated that they would select the ACE class (W=64%, BPs=60%). After the class there was an increase in the number of women who indicated that they had thought about strategies for coping with labour (91% post vs 78% pre) and knew how to find further answers to questions about labour and birth (89% post vs 64% pre).

#### *Feedback from Midwives*

Midwives generally felt the session went to plan, liked the COVID-imposed small group sizes and the structure. However, they wanted more interaction and time to deliver the class. These data are presented in supplementary file 5.

#### ***Phase 4: Refinement:***

*During the intervention:*

Changes were made in response to the midwife focus group and the feedback from the interviews with parents. These included adding in more explanation of emergencies, rearranging the seating plan and the way the resources were displayed.

*Post-intervention refinement:*

We made changes where there were consistent reports from midwives, parents or both that a change should be made. These are displayed in table 2. Overall, 38 changes were recommended: 22 by parents, 5 by midwives, and 11 by both. We have incorporated 36 of these within the training manual. We were unable to address two consistently requested changes: 1) the introduction of a postnatal session, because this was outside the remit of this project, and 2) improvement to the ethnic and socio-economic diversity of the videos, as we were limited by those who were willing to be filmed. We did not have sufficient funding to develop further videos.

**Discussion:**

In this paper we present the co-design and feasibility work of an optimised two-hour antenatal education session for labour and birth. The ACE birth journeys 'river' concept was developed by the co-design groups and delivered by local clinical staff to participants. Through implementation in an NHS setting and evaluation with both participants and providers we systematically identified key issues in the delivery of the session both concurrently and after completion of the classes. We used a collaborative, systematic decision-making approach to addressing issues that were consistently reported by women, midwives or both leading to refinements, to the ACE manual, and the development of a class that can be delivered within the constraints of NHS capacity.

In general women/pregnant people reported enjoying the session, found it informative and useful in helping them to prepare for birth. However, it is notable that partners described being less engaged with the class. Nonetheless, both women/pregnant people and their partners who provided feedback found specific content of the session useful.

Women/pregnant people reported increased preparedness, having thought more about coping strategies for labour, and knew how to find further information following the session compared with before attendance.

In this study we have explored potential impacts of the ACE intervention on women/pregnant person's preparedness and informedness. This contributes to the data on antenatal education interventions, which are heterogenous. They include studies on general antenatal education,<sup>20 21 22</sup> promotion of self-efficacy<sup>23</sup> or mindfulness,<sup>24</sup> with some focussing on specific topics or outcomes such as preventing postnatal depression,<sup>25</sup> coping with fear<sup>26</sup> and breastfeeding.<sup>27 28</sup> Many of these interventions have been tested in the context of a clinical trial and their length varies from a few hours to multiple sessions over several weeks. These interventions have not been tested within the NHS. Furthermore, given current NHS resource constraints they are unlikely to be feasible to deliver in the context of current care.

There are some key differences between our approach and that of other studies to evaluating the impacts of the ACE intervention in terms of plausible effects of antenatal education. Many studies into antenatal education focus on clinical outcomes, for example, rates of epidural and mode of birth.<sup>29</sup> We would question whether it is the role of antenatal education to alter mode of birth, and challenge whether value should be placed on reducing or increasing epidural rates – women/pregnant people should be able to select their personal preference.

Our focus was to give information to support preparedness and informed decision making. We believe it may be more beneficial for evaluations of antenatal education to examine outcomes related to what antenatal education should aim to achieve, for example, feelings of preparedness for birth, knowledge of the process of labour and birth, birth expectations and whether their birth has met them, and a sense of empowerment. Elements of existing systematic reviews do suggest that antenatal education can positively impact the labour and birth journey by reducing false labour admissions, which can be stressful for the mother, reduce anxiety and increase partner involvement.<sup>30</sup> A more recent review<sup>31</sup> has suggested that antenatal education can impact maternal stress and improve self-efficacy.<sup>31</sup> A review focusing on childbirth self-efficacy alone suggested that antenatal education promotes women's self-belief and is effective in achieving a positive birth experience.<sup>23</sup> Our study did not specifically measure these outcomes, as our aim was to develop and refine the

intervention, however it is plausible that this co-designed class, covering general birth preparation within the context of a 2-hour session, could contribute to improving experience of birth for women in resource-constrained environments such as the NHS, and should be the focus of future research.

Of particular importance in our findings was the feedback from birth partners. While they found the information useful, they reported that the class did not meet their needs. This finding is in keeping with existing literature suggesting that birth partners feel outnumbered, excluded, anxious and uncertain and require more targeted birth preparation.<sup>32</sup> A recent large qualitative study has highlighted the importance of antenatal education in meeting the needs of birth partners,<sup>33</sup> however there is less literature on exactly how the existing classes could be modified, or new classes designed, to meet the needs of birth partners. While we gathered data from a small number of birth partners during the co-design stage and after evaluation to inform the changes made to the ACE intervention, a limited number of partners took part in them, meaning that it is unclear whether their views were representative. Further research is needed, and should specifically target birth partners, to explore in greater detail their needs to further refine the ACE class.

### *Strengths and limitations*

An important strength of the ACE intervention is that it was delivered within the allotted two hours, by NHS staff and women/pregnant people felt that the intervention was acceptable and useful. This may make it more feasible to roll out across other NHS Trusts. A further strength is that where possible, we iteratively addressed issues throughout the implementation period, to improve the experience for participants, and we sought feedback from multiple sources to enable us to refine the class. Furthermore, this intervention is underpinned by the experiences of women and pregnant people who have recently given birth.

However, we acknowledge that focus groups undertaken lacked ethnic and socio-economic diversity. We attempted to diversify the sample attending the class by contacting all women greater than 24 weeks of pregnancy booked at the trust on up to two occasions to increase engagement. Despite these efforts we did not achieve representation of women/birthing

people that was consistent with our local population. There is evidence of barriers to attendance at antenatal education in women from underserved groups,<sup>34</sup> therefore further efforts to identify ways to better engage these groups are needed. This may be achieved through public-patient involvement activities to identify barriers and how to address them. Increasing accessibility by providing sessions in local settings may increase attendance and provision of classes in other languages could address potential barriers. A weakness identified by attendees was that the class focussed solely on the labour and birth element of antenatal education, this was due to an existing class in our Trust that specifically addresses infant feeding. Finally, COVID-19 restrictions limited the location of the class and the spacing of attendees within it. A physically larger venue was required which meant classes were held centrally. This may have reduced the opportunity for interaction and relationship forming between participants as they attended the class to suit them, rather than the one held in their locality.

### *Conclusion*

We have co-designed a structured antenatal education session about labour and birth that provides women/pregnant people with the information they want and need to prepare for birth, within the constraints of available NHS resource. The next step is to ensure that all parents have access to these classes, to support their journey into birth and beyond. To achieve this, national antenatal education guidelines are urgently needed to ensure equitable access to antenatal education.

### *Funding:*

This work was supported by a Health Foundation Innovating for Improvement award, a David Telling Award and the Elizabeth Blackwell Institute, University of Bristol, and funded in whole, or in part, by the Wellcome Trust Institutional Strategic Support Fund [Grant number - 204813/Z/16/Z]. For the purpose of Open Access, the author has applied a CC BY public copyright licence to any Author Accepted Manuscript version arising from this submission.



AM/MT/ADe were funded by the NIHR for this research project. The views expressed in this publication are those of the author(s) and not necessarily those of the NIHR, NHS or the UK Department of Health and Social Care.

#### Acknowledgements:

Our thanks go to all of the staff, women and their partners who supported the development, attended and provided feedback on the session.

#### Conflicts of interest:

None to declare.

#### Contribution to authorship:

AM conceived the study, obtained funding, designed and carried out study, analysed findings and wrote the first draft of the report. MT, KB, KR, SB, MS, RP, MLa, ADa conceived the study, obtained funding, designed and carried out the study and edited the final draft. MLy designed and carried out the study and edited the final draft. GC, MG analysed the results and edited the final draft. ADe, LW, NM, AC, KB, CD, EH, TRW, EL carried out the study and edited the final draft. CB, AF conceived the study, obtained funding, designed the study and edited the final draft.

#### References

1. Gagnon AJ, Sandall J. Individual or group antenatal education for childbirth or parenthood, or both. *Cochrane Database Syst Rev* 2007;2007(3):CD002869. doi: 10.1002/14651858.CD002869.pub2 [published Online First: 20070718]
2. Excellence NifHaC. Antenatal Care (NG 201), 2021.
3. Alizadeh-Dibazari Z, Abdolalipour S, Mirghafourvand M. The effect of prenatal education on fear of childbirth, pain intensity during labour and childbirth experience: a scoping review using systematic approach and meta-analysis. *BMC Pregnancy Childbirth* 2023;23(1):541. doi: 10.1186/s12884-023-05867-0 [published Online First: 20230727]
4. Downe S, Finlayson K, Oladapo OT, et al. What matters to women during childbirth: A systematic qualitative review. *PLoS One* 2018;13(4):e0194906. doi: 10.1371/journal.pone.0194906 [published Online First: 20180417]
5. Webb R, Ayers S, Bogaerts A, et al. When birth is not as expected: a systematic review of the impact of a mismatch between expectations and experiences. *BMC Pregnancy Childbirth* 2021;21(1):475. doi: 10.1186/s12884-021-03898-z [published Online First: 20210702]

6. Ayers S, Bond R, Bertullies S, et al. The aetiology of post-traumatic stress following childbirth: a meta-analysis and theoretical framework. *Psychol Med* 2016;46(6):1121-34. doi: 10.1017/S0033291715002706 [published Online First: 20160216]
7. Olde E, van der Hart O, Kleber R, et al. Posttraumatic stress following childbirth: a review. *Clin Psychol Rev* 2006;26(1):1-16. doi: 10.1016/j.cpr.2005.07.002 [published Online First: 20050919]
8. Ayers S, Pickering AD. Do women get posttraumatic stress disorder as a result of childbirth? A prospective study of incidence. *Birth* 2001;28(2):111-8. doi: 10.1046/j.1523-536x.2001.00111.x
9. Programme NPS. 2019 survey of women's experiences of maternity care. Statistical Release.
10. Anna Davies MT, Mary Lynch, Lucy Willis, Narendra Mampitiya, Abi Merriel on behalf of the ACE team, . Exploring women's experiences of antenatal education to inform a co-designed class. *BJOG* 2022:157.
11. Davies A, Larkin M, Willis L, Mampitya N, Lynch M, Toolan M, Fraser A, Rawling K, Plachcinski R, Barnfield S, Smith M, Burden C, Merriel A. A qualitative exploration of women's expectations of birth and knowledge of birth interventions following antenatal education. *pre print* 2023 doi: <https://doi.org/10.21203/rs.3.rs-3271195/v1>
12. Anderson E, Brigden A, Davies A, et al. Pregnant women's experiences of social distancing behavioural guidelines during the Covid-19 pandemic 'lockdown' in the UK, a qualitative interview study. *BMC Public Health* 2021;21(1):1202. doi: 10.1186/s12889-021-11202-z [published Online First: 20210623]
13. Craig P, Dieppe P, Macintyre S, et al. Developing and evaluating complex interventions: the new Medical Research Council guidance. *BMJ* 2008;337:a1655. doi: 10.1136/bmj.a1655 [published Online First: 20080929]
14. Damschroder LJ, Aron DC, Keith RE, et al. Fostering implementation of health services research findings into practice: a consolidated framework for advancing implementation science. *Implement Sci* 2009;4:50. doi: 10.1186/1748-5908-4-50 [published Online First: 20090807]
15. Doyle C, Lennox L, Bell D. A systematic review of evidence on the links between patient experience and clinical safety and effectiveness. *BMJ Open* 2013;3(1) doi: 10.1136/bmjopen-2012-001570 [published Online First: 20130103]
16. Foundation TPoC. EBCD: Experience-based co-design toolkit [Available from: <https://www.pointofcarefoundation.org.uk/resource/experience-based-co-design-ebcd-toolkit/> accessed 24th November 2023 2023.
17. Green T, Bonner A, Teleni L, et al. Use and reporting of experience-based codesign studies in the healthcare setting: a systematic review. *BMJ Qual Saf* 2020;29(1):64-76. doi: 10.1136/bmjqs-2019-009570 [published Online First: 20190923]
18. Harris PA, Taylor R, Minor BL, et al. The REDCap consortium: Building an international community of software platform partners. *J Biomed Inform* 2019;95:103208. doi: 10.1016/j.jbi.2019.103208 [published Online First: 20190509]
19. Bradbury K, Morton K, Band R, et al. Using the Person-Based Approach to optimise a digital intervention for the management of hypertension. *PLoS One* 2018;13(5):e0196868. doi: 10.1371/journal.pone.0196868 [published Online First: 20180503]

20. Ickovics JR, Kershaw TS, Westdahl C, et al. Group prenatal care and perinatal outcomes: a randomized controlled trial. *Obstet Gynecol* 2007;110(2 Pt 1):330-9. doi: 10.1097/01.AOG.0000275284.24298.23
21. Maimburg RD, Vaeth M, Durr J, et al. Randomised trial of structured antenatal training sessions to improve the birth process. *BJOG* 2010;117(8):921-8. doi: 10.1111/j.1471-0528.2010.02584.x
22. Ortiz Collado MA, Saez M, Favrod J, et al. Antenatal psychosomatic programming to reduce postpartum depression risk and improve childbirth outcomes: a randomized controlled trial in Spain and France. *BMC Pregnancy Childbirth* 2014;14:22. doi: 10.1186/1471-2393-14-22 [published Online First: 20140115]
23. Demirci AD, Kochan M, Kabukcuoglu K. Effect of antenatal education on childbirth self-efficacy: A systematic-review and meta-analysis. *Current Psychology* 2023;42(14):11367-77. doi: 10.1007/s12144-021-02418-8
24. Duncan LG, Cohn MA, Chao MT, et al. Benefits of preparing for childbirth with mindfulness training: a randomized controlled trial with active comparison. *BMC Pregnancy Childbirth* 2017;17(1):140. doi: 10.1186/s12884-017-1319-3 [published Online First: 20170512]
25. Brugha TS, Wheatley S, Taub NA, et al. Pragmatic randomized trial of antenatal intervention to prevent post-natal depression by reducing psychosocial risk factors. *Psychol Med* 2000;30(6):1273-81. doi: 10.1017/s0033291799002937
26. Rouhe H, Salmela-Aro K, Toivanen R, et al. Obstetric outcome after intervention for severe fear of childbirth in nulliparous women - randomised trial. *Bjog* 2013;120(1):75-84. doi: 10.1111/1471-0528.12011 [published Online First: 20121102]
27. Noel-Weiss J, Rupp A, Cragg B, et al. Randomized controlled trial to determine effects of prenatal breastfeeding workshop on maternal breastfeeding self-efficacy and breastfeeding duration. *J Obstet Gynecol Neonatal Nurs* 2006;35(5):616-24. doi: 10.1111/j.1552-6909.2006.00077.x
28. Forster D, McLachlan H, Lumley J, et al. Two mid-pregnancy interventions to increase the initiation and duration of breastfeeding: a randomized controlled trial. *Birth* 2004;31(3):176-82. doi: 10.1111/j.0730-7659.2004.00302.x
29. Brixval CS, Axelsen SF, Lauemøller SG, et al. The effect of antenatal education in small classes on obstetric and psycho-social outcomes - a systematic review. *Syst Rev* 2015;4:20. doi: 10.1186/s13643-015-0010-x [published Online First: 20150228]
30. Ferguson S, Davis D, Browne J. Does antenatal education affect labour and birth? A structured review of the literature. *Women Birth* 2013;26(1):e5-8. doi: 10.1016/j.wombi.2012.09.003 [published Online First: 20121012]
31. Hong K, Hwang H, Han H, et al. Perspectives on antenatal education associated with pregnancy outcomes: Systematic review and meta-analysis. *Women Birth* 2021;34(3):219-30. doi: 10.1016/j.wombi.2020.04.002 [published Online First: 20200428]
32. Smyth S, Spence D, Murray KB. Does antenatal education prepare fathers for their role as birth partners and for parenthood. *The British Journal of Midwifery* 2015;23:336-42.
33. Spiby H, Stewart J, Watts K, et al. The importance of face to face, group antenatal education classes for first time mothers: A qualitative study. *Midwifery*

- 2022;109:103295. doi: 10.1016/j.midw.2022.103295 [published Online First: 20220225]
34. Jomeen J, Redshaw M. Ethnic minority women's experience of maternity services in England. *Ethn Health* 2013;18(3):280-96. doi: 10.1080/13557858.2012.730608 [published Online First: 20121008]

Figure 1: Our modifications to Experienced based co-design

| <b><i>Pure Experience Based Co-design</i></b>            | <b><i>Our co-design approach</i></b>                                                                                             | <b><i>Details</i></b>                                                                                                                                                                            |
|----------------------------------------------------------|----------------------------------------------------------------------------------------------------------------------------------|--------------------------------------------------------------------------------------------------------------------------------------------------------------------------------------------------|
| Observe clinical areas                                   | None carried out as research team from clinical areas                                                                            | n/a                                                                                                                                                                                              |
| Interview staff, patients and families                   | Focus groups with women and maternity staff.<br>Antenatal women's survey<br>Postnatal women's survey<br>Stakeholder survey       | 7 focus groups with 46 women<br>5 focus groups with 19 midwives and 2 obstetricians<br>722 women<br>870 women<br>99 respondents                                                                  |
| Make a film for feedback                                 | Rapid analysis and sharing of themed findings through oral and MS PowerPoint presentation to co-design groups                    | Research team (obstetricians, midwife, psychologists, service user representative) performed rapid analysis of results (summarised in supplementary file 1) fed back throughout co-design groups |
| Hold staff feedback event                                | Feedback from staff and service user groups at start of co-design sessions.<br><br>Co-design sessions mixed women/partners/staff | 5 Co-design workshops with patient and professional stakeholders: 29 women, 4 partners and their babies and 3 midwives                                                                           |
| Hold patient feedback event                              |                                                                                                                                  |                                                                                                                                                                                                  |
| Joint patient staff event to agree areas for improvement |                                                                                                                                  |                                                                                                                                                                                                  |
| Co-design groups for 4-6 months                          |                                                                                                                                  |                                                                                                                                                                                                  |
| Hold a celebration event                                 | Social media sharing of end of co-design element and start of implementation                                                     | Invited to join email list and social media accounts                                                                                                                                             |

Figure 3: Feedback by Women and Birth partners

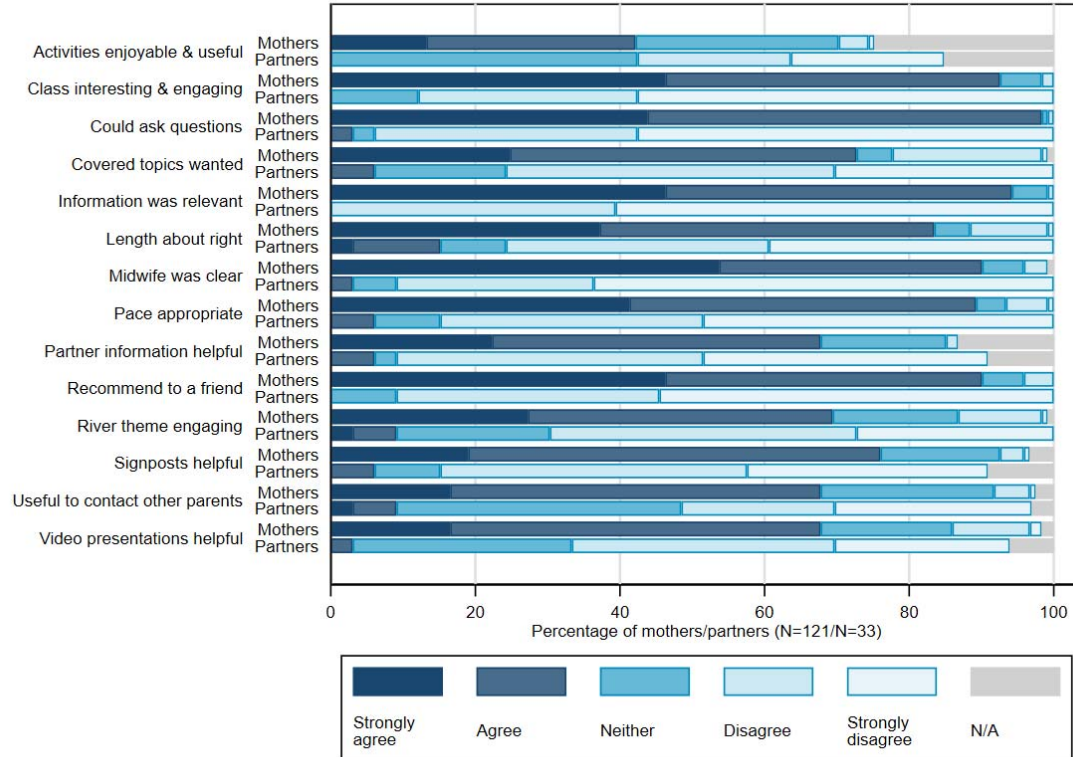

Figure 4: Usefulness of class according to women and birth partners

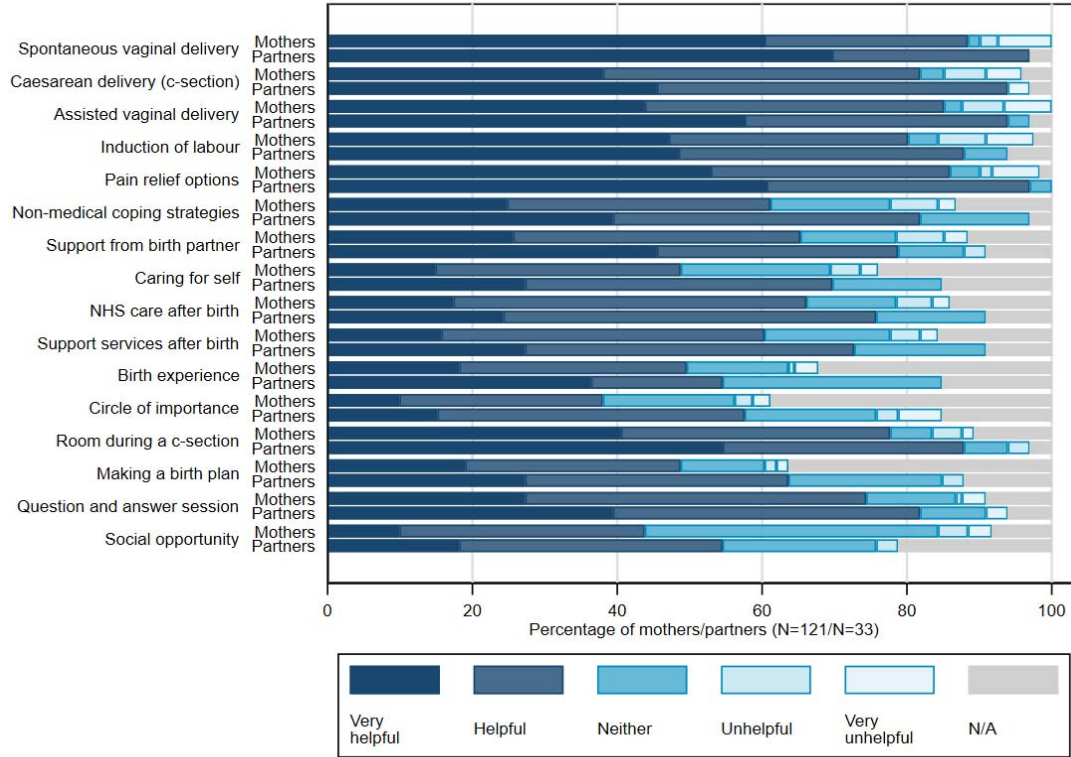

It is made available under a [CC-BY 4.0 International license](https://creativecommons.org/licenses/by/4.0/).

Table 1: Demographics of women and birth partners attending the sessions and completing feedback

|                                          |                             | All session attendees |     |                 |     | Attendees completing feedback |      |                |     |
|------------------------------------------|-----------------------------|-----------------------|-----|-----------------|-----|-------------------------------|------|----------------|-----|
|                                          |                             | Mothers (N=143)       |     | Partners (N=94) |     | Mothers (N=121)               |      | Fathers (N=33) |     |
| Age (years)                              | (mean, SD)                  | 31                    | 4   | 34              | 7   | 31                            | 4    | 34             | 5   |
| Ethnicity                                | Asian or Asian British      | 6/143                 | 4%  | 5/94            | 5%  | 3/118                         | 3%   | 1/32           | 3%  |
|                                          | Black or Black British      | 7/143                 | 5%  | 1/94            | 1%  | 5/118                         | 4%   | 1/32           | 3%  |
|                                          | Chinese                     | 0/143                 | 0%  | 1/94            | 1%  | 0/118                         | 0%   | 1/32           | 3%  |
|                                          | Mixed ethnic background     | 1/143                 | 1%  | 4/94            | 4%  | 1/118                         | 1%   | 27/32          | 84% |
|                                          | White                       | 127/143               | 89% | 80/94           | 85% | 107/118                       | 91%  | 1/32           | 3%  |
|                                          | Other ethnic group          | 2/143                 | 1%  | 2/94            | 2%  | 2/118                         | 2%   | 1/32           | 3%  |
|                                          | Not known                   |                       |     | 1/94            | 1%  | 9/118                         | 8%   | 4/31           | 13% |
| Education                                | GCSE/Equivalent             | 11/142                | 8%  | 13/92           | 14% | 13/118                        | 11%  | 4/31           | 13% |
|                                          | A-levels/ Equivalent        | 20/142                | 14% | 10/92           | 11% | 52/118                        | 44%  | 11/31          | 35% |
|                                          | Bachelors degree/Equivalent | 61/142                | 43% | 34/92           | 37% | 34/118                        | 29%  | 9/31           | 29% |
|                                          | Postgraduate degree         | 38/142                | 27% | 25/92           | 27% | 8/118                         | 7%   | 1/31           | 3%  |
|                                          | Other                       | 10/142                | 7%  | 4/92            | 4%  | 2/118                         | 2%   | 2/31           | 6%  |
|                                          | Prefer not to say           | 11/142                | 8%  | 6/92            | 7%  | 34                            | 3    |                |     |
| Gestational age (weeks)                  | (mean, SD)                  | 34                    | 3   |                 |     | 118/118                       | 100% |                |     |
| No. of babies before this pregnancy      | 0                           | 140/143               | 98% |                 |     | 108/118                       | 92%  |                |     |
|                                          | 1                           | 3/143                 | 2%  |                 |     | 7/118                         | 6%   |                |     |
| No. of pregnancies (including this one)  | 1                           | 130/142               | 92% |                 |     | 2/118                         | 2%   |                |     |
|                                          | 2                           | 9/142                 | 6%  |                 |     | 1/118                         | 1%   |                |     |
|                                          | 3                           | 2/142                 | 1%  |                 |     | 15/118                        | 13%  | 3/32           | 9%  |
|                                          | 8                           | 1/142                 | 1%  |                 |     | 103/118                       | 87%  | 21/32          | 66% |
| Attended NHS class in this pregnancy     | Yes                         | 17/143                | 12% | 10/94           | 11% |                               |      | 8/32           | 25% |
|                                          | No                          | 126/143               | 88% | 57/94           | 61% | 59/118                        | 50%  | 13/31          | 42% |
|                                          | No these were not available |                       |     | 27/94           | 29% | 0/118                         | 0%   | 1/31           | 3%  |
| Attended non NHS class in this pregnancy | Yes                         | 66/143                | 46% | 37/92           | 40% | 16/118                        | 14%  | 12/31          | 39% |
| Attended NHS class in previous pregnancy | Yes                         | 1/143                 | 1%  | 3/92            | 3%  | 102/118                       | 86%  | 18/31          | 58% |
|                                          | No                          | 17/143                | 12% | 34/92           | 37% |                               |      |                |     |
|                                          | Not been pregnant before    | 125/143               | 87% | 55/92           | 60% |                               |      |                |     |



It is made available under a [CC-BY 4.0 International license](https://creativecommons.org/licenses/by/4.0/) .

| Recommendation                                                                                   | By  | Solution                                                                                                                                                                                                                                                | Action                    |
|--------------------------------------------------------------------------------------------------|-----|---------------------------------------------------------------------------------------------------------------------------------------------------------------------------------------------------------------------------------------------------------|---------------------------|
| <b>Content</b>                                                                                   |     |                                                                                                                                                                                                                                                         |                           |
| Guidance on writing birth preferences                                                            | P   | Discuss birth preferences tool supported by a poster including information about local and national birth preference tools.                                                                                                                             | Rewrite section in manual |
| More information on the support partners can offer and their role                                | P   | Re-iterate to midwives at start of manual how important this is                                                                                                                                                                                         | Emphasise in manual       |
| More information on what affects advice on place of birth                                        | P   | Short section in manual highlighting it to midwives                                                                                                                                                                                                     | Addition to manual        |
| Include what to put in hospital bag                                                              | P   | Interactive 'hospital bag' exercise, discuss contents more formally, highlight NHS tool                                                                                                                                                                 | Addition to manual        |
| Include lay out of hospital                                                                      | P   | Suggest direction to local website/tours                                                                                                                                                                                                                | Addition to manual        |
| Outline what equipment available and how to ask for it                                           | P   | Incorporate discussion into coping strategies section                                                                                                                                                                                                   | Addition to manual        |
| More information on pain management not just drugs                                               | P   | Highlight coping strategies to midwives                                                                                                                                                                                                                 | Emphasise in manual       |
| More information on induction and impact on labour and birth                                     | P   | Incorporate impact into discussion of IOL                                                                                                                                                                                                               | Addition to manual        |
| Teach hands on massage                                                                           | P   | Not suitable to incorporate into class as not all women attend with a partner                                                                                                                                                                           | No change                 |
| Practical teaching and discussion on breathing techniques                                        | P   | Incorporate into coping strategies element                                                                                                                                                                                                              | Addition to manual        |
| Enact labour positions                                                                           | P   | Could be culturally inappropriate for some parents/awkward in available space                                                                                                                                                                           | No change                 |
| Include more on theatre/emergencies                                                              | M   | Incorporated already during implementation, add section to manual                                                                                                                                                                                       | Addition to manual        |
| Need more information on post birth recovery                                                     | P/M | Add some immediate postnatal information                                                                                                                                                                                                                | Addition to manual        |
| Cover newborn care/life with baby                                                                | P/M | Outside remit of this class direct to postnatal/infant feeding class                                                                                                                                                                                    |                           |
| Infant feeding methods                                                                           | P   | Outside remit of this class direct to postnatal/infant feeding class                                                                                                                                                                                    |                           |
| <b>Structure</b>                                                                                 |     |                                                                                                                                                                                                                                                         |                           |
| Needs to be more interactive                                                                     | P/M | Add in hospital bag exercise, add in breaks to chat, ensure time at end for people to discuss                                                                                                                                                           | Emphasise in manual       |
| Need to be able to get up and move                                                               | P   | Add it 2x5 min breaks                                                                                                                                                                                                                                   | Addition to manual        |
| Sitting in rows does not support interaction                                                     | P/M | Set up in circle if feasible or around a table.                                                                                                                                                                                                         | Emphasise in manual       |
| Need to have two sessions/more time                                                              | P/M | No change – not in remit                                                                                                                                                                                                                                |                           |
| Integrate coping strategies throughout                                                           | M   | Emphasise to midwives to draw in coping strategies throughout                                                                                                                                                                                           | Emphasise in manual       |
| Late in the evening                                                                              | P   | Offer a variety of times                                                                                                                                                                                                                                | Emphasise in manual       |
| <b>Presentation</b>                                                                              |     |                                                                                                                                                                                                                                                         |                           |
| River concept not well integrated                                                                | P/M | Encourage staff to use concept and gain experience                                                                                                                                                                                                      | Emphasise in manual       |
| Use more empowering language                                                                     | P   | Emphasise to staff the importance of language                                                                                                                                                                                                           | Emphasise in manual       |
| Staff need to be consistently trained and confident with material                                | P   | Develop the manual further and clear training                                                                                                                                                                                                           | Training video and manual |
| Did not use or explain post it notes                                                             | P   | Each midwife to choose personal mechanism for enabling parents to ask questions                                                                                                                                                                         | Emphasise in manual       |
| Two people presenting would be better                                                            | M   | Recommendation in manual that if two people are able to facilitate the session it would be easier to deliver session                                                                                                                                    | Emphasise in the manual   |
| <b>Resources</b>                                                                                 |     |                                                                                                                                                                                                                                                         |                           |
| Couldn't see the labour posters well                                                             | P/M | Local trusts to use their existing posters/resources to support the explanation of labour                                                                                                                                                               | Use existing resources    |
| Posters fell off the wall                                                                        | P/M | We developed a solution in the manual, Provide our solution in the manual                                                                                                                                                                               | Addition to manual        |
| Use all first time parents in videos                                                             | P   | Classes are not restricted to first time parents only. Could raise additional funds to make extra videos                                                                                                                                                | Future action             |
| Use more diverse parents in videos                                                               | P   | We acknowledge this issue, however were only able to make videos with those who volunteered.                                                                                                                                                            | Future action             |
| Ensure video's work                                                                              | P/M | Ensure staff are able to work laptops and projector                                                                                                                                                                                                     | Emphasise in manual       |
| Could share link to videos                                                                       | P   | We are unable to do this as do not have permission to use them outside of the class but acknowledge this is a good idea for future.                                                                                                                     | Future action             |
| Need a picture for waters breaking                                                               | M   | Develop additional picture.                                                                                                                                                                                                                             | Add to manual             |
| Show forceps in the class                                                                        | P/M | Encourage midwives to borrow forceps for the class                                                                                                                                                                                                      | Emphasise in manual       |
| Birth preferences tool not useful , but concept of considering what is most important to you is. | M   | Emphasise the discussion of the concept of considering what is important but remove the idea of printing the tool                                                                                                                                       | Alteration to manual      |
| <b>Other</b>                                                                                     |     |                                                                                                                                                                                                                                                         |                           |
| Feeling that the content was medicalised                                                         | P/M | Ensure that time is given to non-pharmacological coping strategies and that there is not an expectations of interventions however due to the codesign process and other positive feedback we are not planning to remove discussion about interventions. | Emphasise in manual       |
| A lot to remember, needed to take notes                                                          | P   | Encourage signposting to local / national resources                                                                                                                                                                                                     | Add a manual section      |
| Conflicting information with other providers e.g. pethidine being bad vs good                    | P   | Reminder that that the information in the manual is as far as is possible inline with NICE guidelines and that this class, when delivered as co-designed is evidence based and balanced                                                                 | Emphasise in manual       |
